# Supplementary material for: A review of carbon recovery in sewage treatment and analysis of product options for a typical water recycling plant
Source: Royal Society of Chemistry journal article supplement (doi:10.1039/d4ew00160e), 2024-01-01
Supplement: d4ew00160e1.pdf [file d4ew00160e1.pdf]

## A review of carbon recovery in sewage treatment and analysis of product options for a typical water recycling plant

Arash Mohseni<sup>1</sup>, Linhua Fan<sup>1</sup>, Li Gao<sup>2</sup>, Joel Segal<sup>2</sup> and Felicity Roddick<sup>1</sup>

<sup>1</sup> School of Engineering, RMIT University, Victoria, Australia

<sup>2</sup>South East Water Corporation, Frankston, Victoria, Australia

### SUPPLEMENTARY INFORMATION

**Table S1 Ranking system for the factors taken into consideration for TBL evaluation**

|                        | High (Score=3)                                                          | Moderate (Score=2)                               | Low (Score=1)                            |
|------------------------|-------------------------------------------------------------------------|--------------------------------------------------|------------------------------------------|
| Simplicity             | <3 Unit operations                                                      | > 3 Unit operations                              | Complex process                          |
| Readiness              | TRL 7-9                                                                 | TRL 5-7                                          | TRL <5                                   |
| Effectiveness          | High recovery and sludge volume reduction (up to 90%)                   | Moderate recovery and sludge volume reduction    | Low recovery and sludge volume reduction |
| Cost of technology     | Low indicative cost                                                     | Medium indicative cost                           | High indicative cost                     |
| Ease of implementation | Minimal modification                                                    | Multiple modifications                           | Complex modification                     |
| Environmental impact   | High waste and emission reduction                                       | Moderate waste and emission reduction            | Low waste and emission reduction         |
| Market demand          | <sup>1</sup> OGR > 1% and <sup>2</sup> CMD >1B USD and less competitive | OGR > 1% and CMD > 1B USD and highly competitive | OGR < 1% and CMD < 1B USD                |

<sup>1</sup>OGR: Overall growth rate, <sup>2</sup>CMD: Current market demand

**Table S2 Comparative assessment of potential carbonaceous products recovered from sewage**

| Product          | <sup>1</sup> Simplicity | <sup>2</sup> Readiness | <sup>3</sup> Effectiveness | <sup>4</sup> Cost of Tech. | <sup>5</sup> Ease of implementation | Env. Impact | Market demand | Total |
|------------------|-------------------------|------------------------|----------------------------|----------------------------|-------------------------------------|-------------|---------------|-------|
| Methane          | 3                       | 3                      | 2                          | 3                          | 3                                   | 3           | 3             | 20    |
| Syngas           | 2                       | 2                      | 3                          | 1                          | 1                                   | 3           | 3             | 15    |
| Biochar          | 3                       | 2                      | 3                          | 2                          | 3                                   | 3           | 3             | 19    |
| Activated carbon | 2                       | 2                      | 3                          | 2                          | 2                                   | 3           | 3             | 17    |
| Bio-oil          | 2                       | 2                      | 1                          | 2                          | 2                                   | 3           | 1             | 13    |
| Biodiesel        | 2                       | 2                      | 1                          | 2                          | 2                                   | 3           | 2             | 14    |
| VFAs             | 3                       | 2                      | 2                          | 3                          | 3                                   | 3           | 3             | 19    |
| PHAs             | 3                       | 2                      | 2                          | 3                          | 3                                   | 3           | 2             | 18    |
| EPSs             | 3                       | 2                      | 3                          | 3                          | 3                                   | 3           | 1             | 18    |
| Cellulose        | 3                       | 3                      | 3                          | 3                          | 3                                   | 3           | 3             | 21    |
| Enzymes          | 3                       | 3                      | 1                          | 3                          | 3                                   | 2           | 2             | 17    |
| Proteins         | 3                       | 3                      | 2                          | 2                          | 3                                   | 3           | 3             | 19    |
| Bio-pesticides   | 3                       | 2                      | 2                          | 2                          | 3                                   | 3           | 2             | 17    |
| Bio-surfactants  | 3                       | 3                      | 3                          | 2                          | 2                                   | 3           | 1             | 17    |
| Bio-fertiliser   | 3                       | 3                      | 2                          | 2                          | 3                                   | 3           | 1             | 17    |

Ranking scale: 3 for high, 2 for moderate, and 1 for low

<sup>1</sup> Simplicity in terms of the number of unit operations and complexity of associated technology

<sup>2</sup> TRL

<sup>3</sup> Efficiency of conversion of sludge into final products and sludge volume reduction

<sup>4</sup> Energy and chemical costs associated with the production

<sup>5</sup> Ease of integration into the current WRP
